# Supplementary material for: CD56negCD16+NK cells are activated mature NK cells with impaired effector function during HIV-1 infection
Source: Springer Nature journal article supplement (doi:10.1186/1742-4690-10-158), 2013-12-01

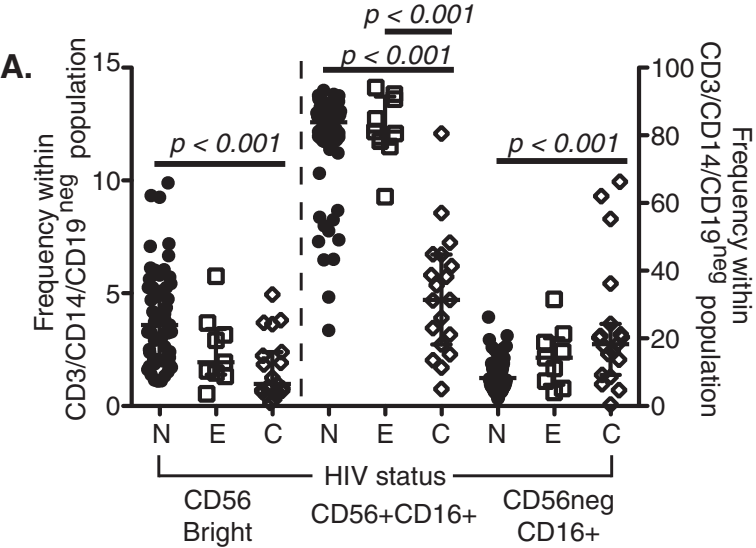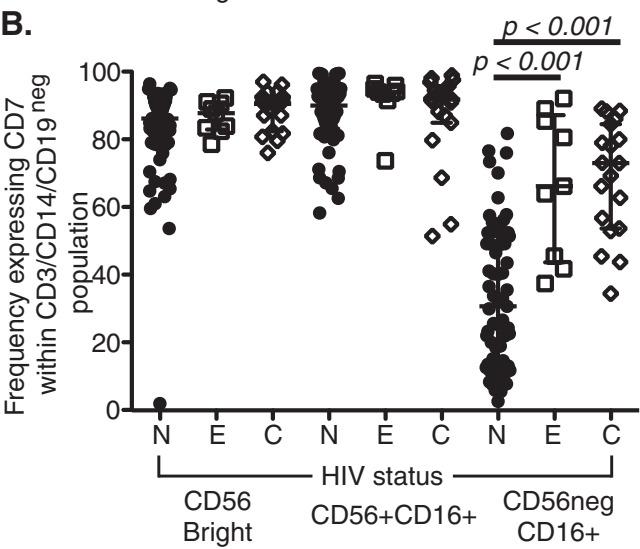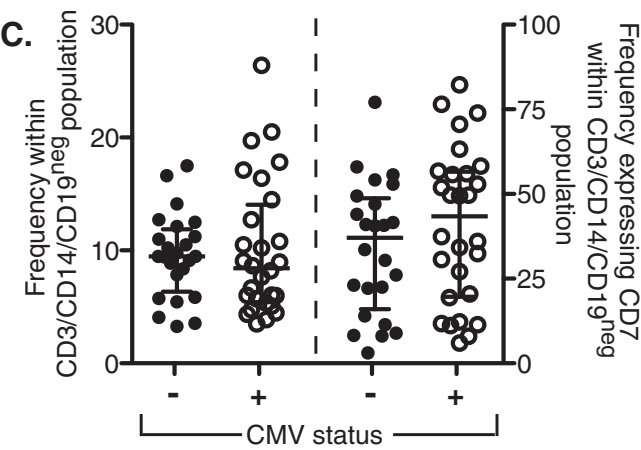

Supplement: 12977_2013_3867_MOESM4_ESM.pdf [file 12977_2013_3867_MOESM4_ESM.pdf]
